# Supplementary material for: Onderzoek bloei Nerine bowdenii: invloed groeiduur op bloei
Source: Springer Nature journal article supplement (doi:10.1186/s13014-019-1341-x), 1984-01-01
Supplement: MOESM1 [file 17019730]

  


Integrative assessment of brain and bone invasion in meningioma patients | springermedizin.de


Integrative assessment of brain and bone invasion in meningioma patients | springermedizin.de
Skip to main content

Menü

Hauptrubriken

Chevron down icon


Chevron up icon

CME


Facharzt-Training


Webinare


Zeitschriften


Bücher


e.Medpedia


Podcast

Newsletter


Abo-Shop

Service

Chevron down icon


Chevron up icon

Jobbörse


Info & Hilfe

Fachgebiete

Chevron down icon


Chevron up icon

Anästhesiologie


Allgemeinmedizin


Arbeitsmedizin


Augenheilkunde


Chirurgie


Dermatologie


Gynäkologie und Geburtshilfe


HNO


Innere Medizin


Kardiologie


Neurologie


Onkologie und Hämatologie


Orthopädie und Unfallchirurgie


Pädiatrie


Pathologie


Psychiatrie


Radiologie


Rechtsmedizin


Urologie


Zahnmedizin

Themen

Chevron down icon


Chevron up icon

Klimawandel und Gesundheit


Neues aus dem Markt


COVID-19


Praxis und Beruf


Seltene Erkrankungen


GOÄ & EBM


Panorama

Sammlungen

Chevron down icon


Chevron up icon

Kasuistiken


Algorithmen & Infografiken


Blickdiagnosen


Arthropedia


FlapFinder (für Dermatochirurgen)


Videos


Kongressberichterstattung


Medizin für Apothekerinnen und Apotheker


Für Ärztinnen und Ärzte in Weiterbildung


Für Medizinstudierende

Springer Medizin

Suche

Search icon

Erweiterte Suche

Anmelden

### Springer Medizin

JAVASCRIPT BENÖTIGT

Bitte aktivieren Sie Java-Script in Ihrem Browser, damit Sie alle Vorteile und Funktionen dieser Website nutzen können.

INTERNET EXPLORER WIRD NICHT MEHR UNTERSTÜZT

Der Internet Explorer wird als Browser seitens Microsoft nicht mehr unterstützt. Für Ihr optimales Nutzungserlebnis wählen Sie bitte Microsoft Edge, Safari, Chrome oder Firefox als Browser.

nach oben

Radiation Oncology

Erschienen in:

Open Access
01.12.2019 | Research

# Integrative assessment of brain and bone invasion in meningioma patients

verfasst von:
Kerstin Zwirner, Frank Paulsen, Jens Schittenhelm, Irina Gepfner-Tuma, Ghazaleh Tabatabai, Felix Behling, Marco Skardelly, Benjamin Bender, Daniel Zips, Franziska Eckert

Erschienen in:
Radiation Oncology 
|
Ausgabe 1/2019

insite

INHALT

- Background
- Methods
- Results
- Discussion
- Conclusions
- Acknowledgements
- Ethics approval and consent to participate
- Consent for publication
- Competing interests
- Publisher’s Note

download

DOWNLOAD

print

DRUCKEN

SUCHEN IM ARTIKEL
close

0  /  0

0

Vorherige

Nächste

insite

SUCHEN

## Abstract

### Background

Various prognostic factors have been suggested in meningioma patients including WHO grading, brain invasion and bone involvement, for instance. Brain invasion was included as an independent criterion in the recent WHO classification. However, assessability of brain or bone involvement is often limited or varies between histopathologic, operative and imaging reports. Objective of our study was to investigate prognostic values including brain and bone involvement according to different clinical approaches.

### Methods

A cohort of 111 patients was treated with primary, adjuvant or salvage irradiation between 2008 and 2017 using intensity-modulated radiotherapy. Positron-emission tomography (PET) was available for treatment planning in 81% of patients. Clinical data were extracted from the medical reports. Brain and bone involvement were stratified separately according to histopathologic, operative and imaging reports as well as judged in synopsis.

### Results

WHO grade I tumours, lower estimated proliferation index, primary versus recurrence treatment and localization (i.e. skull base, optic nerve sheath) were beneficial prognostic factors for local control. Judgement of brain and bone invasion partly differed between diagnostic modalities. In synopsis, brain or bone invasion did not show a significant influence on local control rates.

### Conclusions

Several previously described prognostic factors could be reproduced. However, partly divergent histopathological, surgical and image-based judgements could be found in regard to brain and bone invasion and all methods imply limitations. Therefore, we suggest a particular, complemental synopsis judgement. In synopsis, brain or bone involvement did not coherently impair local control in our irradiated patients. This might be explained by elaborate radiation techniques and PET-based treatment planning.

Begleitmaterial

Additional file 1: Figure S1. Overview of assessable reports (‘yes’ or ‘no’) in regard to brain invasion and available, overlapping reports of the different modalities. Figure S2. Assessable reports (‘yes’ or ‘no’) in regard to bone involvement and the overlap of the different modalities. Figure S3. Cross-classification tables for a) the surgeon’s description of brain invasion and corresponding histopathologic findings and b) operative reports considering bone invasion and associated imaging-based findings. Only assessable and distinct results (‘yes’ and ‘no’) were considered. (PDF 122 kb)

Hinweise

## Electronic supplementary material

The online version of this article (https://​doi.​org/​10.​1186/​s13014-019-1341-x) contains supplementary material, which is available to authorized users.

## Publisher’s Note

Springer Nature remains neutral with regard to jurisdictional claims in published maps and institutional affiliations.

Abkürzungen

CNS

Central nervous system

CT

Computed tomography

CTV

Clinical target volume

GTV

Gross tumour volume

IMRT

Intensity-modulated radiotherapy

MIB-1

Molecular immunology borstel

MRI

Magnet resonance imaging

PET

Positron-emission tomography

PET/CT

Positron-emission tomography combined with computed tomography

PET/MRI

Positron-emission tomography combined with magnet resonance imaging

PFS

Progression-free survival

PTV

Planning target volume

WHO

World Health Organization

## Background

Primary radiotherapy or surgical resection are considered as treatment options for patients with progressive or symptomatic meningiomas [1]. Furthermore, postoperative radiotherapy is indicated if patients are at risk for local failure. Previously described risk factors for recurrence imply incomplete resection [2], higher histopathological grading according to the World Health Organization (WHO) classification [3], increased proliferation activity (e.g. Molecular Immunology Borstel (MIB-1) immunohistochemistry) [4], bone involvement [5] and brain invasion [6]. Histological brain invasion is even considered as an individual criterion for atypia (WHO grade II) and was included in the recent WHO classification 2016 [7]. Involvement of brain tissue is commonly defined by histopathological criteria referred to Perry et al. (1997) [6]. However, in this study, the majority of meningioma specimens lacked central nervous system (CNS) tissue and therefore, brain invasion could not be determined. The lack of brain tissue might be due to partial resections or because the arachnoid layer was respected by the meningioma and a resection of brain tissue was not considered necessary during surgery. The authors considered these samples (85%) as (pathologically) ‘unassessable’ [6]. In regard to the ‘assessable’ (i.e. adjacent CNS tissue; invasion determined as present or absent) specimens, a considerable discrepancy between surgeon’s gross impression and histologic findings was claimed (κ = 0.09; poor agreement) [6]. Therefore, clinicopathological judgement of brain invasion implies several pitfalls. Furthermore, many risk factors were mainly established in surgically treated cohorts and translation to irradiated patients remains controversial. Even in surgically treated patients, the stand-alone impact of brain invasion on prognosis has been critically addressed, recently [8‐10]. Also, judgement of bone involvement is sometimes ambiguous, even though it has considerable implications on target volume definition in radiation treatment planning [11].

The aim of our study was to validate previously described prognostic factors in patients treated with radiotherapy. Furthermore, we evaluated histopathological, operative and imaging reports individually and in synopsis in regard to brain and bone invasion to consider potential discrepancies and limitations of the individual modalities.

Anzeige

## Methods

In our single-centre cohort of meningioma patients, we retrospectively screened for patients treated with intensity-modulated radiotherapy (IMRT) with or without prior surgery between 2008 and 2017. The analysis was approved by the local ethics committee (417/2017B02). Patients without evaluable follow-up or re-irradiated patients were excluded. Clinical features and follow-up data were extracted from the medical reports.

The extent of resection (subtotal versus gross tumour resection) was documented according to the operative report and post-operative imaging. The localization of meningiomas was subclassified into optic nerve sheath and skull base meningiomas versus ‘other’ meningiomas. Furthermore, the availability of positron-emission tomography (PET) with somatostatin-analogue tracers (combined with computed tomography (PET/CT) or magnet resonance imaging (PET/MRI)) for treatment planning and the intention of irradiation (primary radiotherapy, adjuvant radiotherapy, adjuvant radiotherapy after salvage surgery or salvage radiotherapy) were recorded. Salvage therapies were defined as therapy initiation for tumour recurrence or progression.

All patients in our series were treated with IMRT and image guidance as fractionated stereotactic radiotherapy. The applied radiation dose ranged between 54.0Gy (WHO grade I meningiomas, optic nerve sheath and skull base meningiomas without prior surgery) and 60.0Gy (WHO grade II meningiomas in other localizations). In case of meningiomas with close proximity to the optic nerve or chiasm, patients were treated with a simultaneous integrated boost (1.7Gy / 1.8Gy) up to a total dose of 51.0Gy / 54.0Gy (planning target volumes PTV51 / PTV54). The gross tumour volume (GTV) was defined as the contrast-enhancing region in T1-weighted MRI in synopsis with the PET dataset, both co-registered to the planning CT. An obvious dural tail was included within the GTV. For skull base meningiomas near the visual pathway or the brain stem, the PTV was defined as GTV plus a safety margin: 5 mm margin for the PTV51 and 2 mm margin for the PTV54. For other tumours, larger margins of approximately 10 mm alongside the meninges were used for the clinical target volume (CTV) and 5 mm safety margin to the PTV. In case of brain or bone involvement, approximately 10 mm around the cavity into the brain / bone or around the GTV were included as also described as accepted treatment strategies in recent reports [12, 13].

Most histopathological reports for grading were provided before the recent 2016 WHO classification was established. However, all samples with histologically proven brain invasion (which was recorded independently) from this time period were also classified as WHO grade II meningiomas because further criteria of atypia (mitotic activity) were apparent. Thus, all samples are consistent with the latest WHO classification (2016). The majority of histopathologic reports provided estimated MIB-1 staining to indicate the proliferative activity. The average values of the reports were documented and patients were arbitrarily separated into two risk groups according to the median (MIB-1 < 4% and MIB-1 ≥ 4%) based on previous reports [14].

Anzeige

Brain and bone invasion were retrospectively assessed based on histopathological, operative and diagnostic imaging reports separately and in synopsis. Assessable data of the different modalities that allowed a distinct consideration (‘yes’ or ‘no’) varied and are shown in the Additional file 1: Figures S1 and S2. The graduation of Perry et al. (1997) [6] was used to record histopathological brain invasion. If no CNS parenchyma was reported, the sample was regarded as histopathologically unassessable. In case of adjacent CNS tissue, brain invasion was considered as either present or absent.

For the synopsis evaluation, all information was considered (Fig. 1). If data of one modality was missing and others commented on invasion, the available information was used to compensate the missing ones. In case of contradicting information, plausibility was considered by the explicitness of the reports. If there were no distinct arguments to decide otherwise, pathologic reports were ranked as most important, followed by the surgeon’s description. In synopsis, invasion was considered as absent if none of the reports commented on involvement. Therefore, in synopsis evaluation, all patients of the cohort were included.

Fig. 1

Synopsis evaluation considerations

×

Progression-free survival (PFS) was calculated from the first day of radiotherapy and defined by local control of the irradiated lesion according to the last follow-up. For the statistical analysis we used SPSS (version 25, IBM Corp., Armonk, NY). To estimate local recurrence, the Kaplan-Meier method was applied. For comparison of different risk groups, we used the log-rank test. Cox regression was used for multivariate analysis and the chi-square test was performed for additional estimations. P-values < 0.05 were considered significant. Cross-classification tables were used for modality comparison if numbers were considered sufficient and relevant to present interrelationships.

## Results

In total, 111 patients (78 female, 33 male patients) met the inclusion criteria and were eligible for evaluation. Median age at primary diagnosis was 52 years (range 21–82 years) and at initiation of radiotherapy, the median age was 56 years (range 22–82 years). Detailed patient and treatment characteristics are shown in Table 1. In 81% of patients, radiotherapy planning was supported by PET/CT or PET/MRI imaging. Median follow-up was 3.3 years (range 0.3–10.2 years) and the 2-year and 4-year local control rates were 97.6 and 88.7%.

Table 1

Patient and treatment characteristics

|  |  |  |
| --- | --- | --- |
| WHO grading (n, %) | | |
| WHO grade I | 34 | 31% |
| WHO grade II | 28 | 25% |
| Unknown | 49 | 44% |
| Initial treatment (n, %) | | |
| Primary radiotherapy | 49 | 44% |
| Initial resection, adjuvant radiotherapy | 15 | 14% |
| Salvage re-resection, adjuvant radiotherapy | 9 | 8% |
| Salvage radiotherapy | 38 | 34% |
| Resection status (n, %) | | |
| Gross total resection | 29 | 26% |
| Subtotal resection | 26 | 23% |
| Unknown | 7 | 6% |
| Radiotherapy planning (n, %) | | |
| PET-based treatment | 90 | 81% |
| No PET available | 21 | 19% |
| Localization (n, %) | | |
| Optic nerve sheath / skull base meningiomas | 72 | 65% |
| Others | 39 | 35% |

Abbreviations: WHO World Health Organization, PET positron emission tomography

In our irradiated cohort, in univariate analysis we found significant differences of PFS stratified by WHO grade I versus WHO grade II meningiomas (p = 0.026), estimated MIB-1 staining below 4% (p = 0.019), primary or adjuvant radiotherapy versus salvage treatment (p = 0.003) and the localization (in favour of skull base and optic nerve sheath meningiomas compared to other localizations, p = 0.007). The respective Kaplan-Meier curves are visualized in Fig. 2. In multivariate analysis, none of the univariate prognostic factors remained significant (data not shown). We did not find significant differences in PFS regarding the resection status (subtotal versus gross total resection, p = 0.184, data not shown).

Fig. 2

Kaplan-Meier curves for progression-free survival in regard to a) World Health Organisation (WHO) grading; b) Molecular Immunology Borstel (MIB-1) immunohistochemistry (groups were separated by the median); c) intention of radiotherapy (RT) treatment (primary radiotherapy vs. adjuvant radiotherapy vs. salvage surgery and subsequent adjuvant radiation vs. salvage radiotherapy; the p-value is related to the primary and adjuvant versus the salvage groups); d) localization (skull base and optic nerve sheath meningiomas versus other locations)

×

Kaplan-Meier plots in regard to brain invasion are shown in Fig. 3. Histopathological, surgical and image-based investigations are illustrated separately. Respective numbers of assessable reports are presented in the Additional file 1: Figure S1. The synopsis (n = 111) was plotted individually for clarification.

Fig. 3

Progression-free survival curves for brain invasion according to a) the histopathologic report; b) the operative report; c) imaging reports and d) in synopsis evaluation

×

Patients with histopathologically proven brain invasion (n = 9) showed a trend towards improved local control compared to patients without brain invasion (n = 12) (Fig. 3a, p = 0.062). Considering these subgroups, the patients with histologically proven brain invasive meningiomas were more likely to receive adjuvant radiotherapy (n = 6) rather then salvage treatment (n = 3). In contrast, patients without brain invasion in histopathology mainly received salvage radiotherapy (n = 7) rather then adjuvant treatment (n = 3) or adjuvant treatment after salvage surgery (n = 2).

In seven patients, brain invasion was explicitly described in the operative report, but no CNS tissue was found according to the histopathology report. In cases where both reports were available, the surgeon’s description of brain invasion was considerably discrepant to histopathologic findings as shown in Fig. 3a/b and the cross-classification table (Additional file 1: Figure S3a, p = 0.205). If brain invasion was explicitly considered absent in operative (n = 6) or imaging reports (n = 16), no event was recorded during follow-up (Fig. 3b/c). In synopsis of the different investigation modalities, brain invasion had no significant influence on PFS in our irradiated cohort (Fig. 3d, p = 0.471).

Anzeige

Bone invasion was suspected in 22 patients according to the operative reports but bone tissue was only found in ten histopathologic samples. In eight specimens, bone invasion was confirmed. In one patient bone invasion was suspected by the surgeon but not confirmed histopathologically, and in one case, the operative report is missing but bone involvement was reported in histopathology. Of the patients with pathologically proven bone invasion, only one received adjuvant radiotherapy whilst eight patients were irradiated by means of salvage treatment for recurrence.

The surgical and imaging assessment of bone invasion were concordant in the majority of patients. In 25 patients both reports were assessable. In these, 22 findings were concordant and three were discrepant (Additional file 1: Figure S3b, p = 0.001).

Figure 4 shows the PFS curves of pathological, surgical and image-based considerations of bone invasion and the synopsis judgement. The patient with negative pathologic report considering bone invasion had tumour recurrence, whilst only one of the pathologically proven bone invasive meningiomas recurred after radiotherapy (Fig. 4a; p-value not estimated due to small numbers). Operative and image-based findings did not show significantly different PFS regarding the groups with suspected versus non-suspected bone invasion (Fig. 4b, p = 0.207 and 4c, p = 0.804). The synopsis consideration also did not differentiate prognosis according to bone invasion (Fig. 4d, p = 0.175).

Fig. 4

Kaplan-Meier plot for progression-free survival considering bone invasion by a) the histopathologic report; b) the operative report; c) imaging reports and d) by synopsis

×

## Discussion

In our cohort of meningioma patients treated with either primary, adjuvant or salvage radiotherapy, several previously described prognostic factors could be confirmed. WHO grading, MIB-1 proliferation activity, initial versus salvage treatment and the localization showed significant prognostic values in univariate analysis. These prognostic factors are well in line with several previous reports [15‐17]. However, better prognosis of skull base and optic nerve sheath meningiomas in our study appears contrary to other publications. Convexity meningiomas were reported to perform better than skull base (or generally other) meningiomas due to superior surgical accessibility [16, 18]. This previously proposed prognostic influence of the localization might have been partly overcome by recent surgical techniques or changes in management by elected partial, maximal-safe resections and adjuvant radiotherapy [2]. In spite of potentially diverse genetic and biogical features of skull base and convexity meningiomas, our surprisingly favourable results of skull base or optic nerve sheath meningiomas might be mainly explained by the selection bias of primary irradiated patients, and we presume our significant prognostic factors to be interrelated. As tumours with difficult accessibility are predominantly treated with primary radiotherapy, mostly benign histologic subtypes can be assumed in this subgroup. Convexity meningiomas are more likely to be resected a priori. Those patients typically receive radiotherapy only in case of risk factors or recurrence (negative selection). Therefore, in our cohort, the localization, initial versus salvage radiotherapy, WHO grading and MIB-1 index are supposed to be related. Thus, it appears intuitive that in multivariate analysis none of the prognostic factors remained significant independently.

Anzeige

We decided intentionally not to re-evaluate the histopathologic or imaging reports as the therapeutic decisions in this retrospective study were based on the original reports and not on a potential re-evaluation. The intention was to retrace the daily routine setting without extensive sampling or specifically focused reports. Not all operative or imaging reports commented on brain or bone invasion in spite of potential evaluability, and relevant information could have been missed. Furthermore, MIB-1 staining was solely estimated for the routine reports by different observers, and no exact single-observer re-evaluation was conducted. These considerations might be a benefit (i.e. real setting) and limitation (i.e. potential of some incorrect assessments) of the study at the same time. Further limitations imply the retrospective character and diverse clinical constellations in regard to initial treatment and patient’s performance. Furthermore, image-based consideration of brain invasion is limited to indirect hints such as massive edema or lack of invasion criteria. Besides, some subgroup analyses were limited by small numbers.

Bone or brain invasion did not arise as negative prognostic factors for PFS in synopsis of investigated aspects including pathology, surgery and imaging in our irradiated cohort. According to Perry et al. (1997), judgement of brain invasion implies several pitfalls [6]. First, in many meningioma samples, CNS parenchyma cannot be found and therefore brain invasion cannot be judged due to (intentional) surgical or pathological undersampling. In line with this concern, in several cases of our study, CNS tissue was not available for assessment.

The sampling issues were addressed recently as extensive histopathologic sampling could improve invasion assessability [9]. Other groups did not differentiate between assessable and unassessable specimens, but diagnosed brain invasion in samples without CNS tissue as absent [10]. For pragmatic reasons this might be legitimate and probably reflects the daily practice and interpretation of reports in the clinical setting. However, by different definitions of brain invasion, the controversy of data interpretation about the prognostic value of brain invasion is even aggravated.

Sun et al. (2016) reported on patients who received adjuvant or salvage radiotherapy for meningiomas [19]. Brain invasion was found to be a negative prognostic factor for PFS in both assessable samples and unassessable samples, if those were considered as negative. In contrast, our data indicate that even in assessable samples, the predictive value of brain invasion might be limited. Histopathologically proven brain invasion showed even a trend towards improved PFS compared to patients where brain invasion was explicitly absent. This might be explained by the relevant rate of adjuvant radiotherapy treatment in our patients with histopathologically confirmed brain invasion. This intensified treatment at primary diagnosis could have prevented tumour progression or recurrence. However, these findings have to be interpreted with caution due to the limited patient number in the subgroup and need to be investigated in bigger cohorts.

Anzeige

As a second pitfall, divergent assessments of surgeons and pathologists regarding gross and microscopic findings of brain invasion have been described before and are difficult to interpret [6]. These challenges are in line with our data of relevant discrepancies between surgical findings and pathologic reports. A recent review suggests that a considerable tissue fraction might not be sent to pathology due to intraoperative suction, or it might not be assessable due to subtotal resection [20]. Therefore, the authors recommend sampling of different surface sites and to explicitly provide clinical information to the neuropathologist. This issue is replicated in our data. In seven patients brain invasion was suspected during surgery but no CNS tissue was found in histopathology.

Undersampling cannot be ruled out when using only one modality to judge brain invasion, which we tried to address via synopsis evaluation. For the synopsis we used a ranking including pathological, surgical and image-based information and considered plausibility and time-relation to radiotherapy. Patients without any reliable information about brain invasion were considered as non-invaded. Therefore, all 111 patients could be classified. Synopsis-based consideration of brain invasion did not show a significant influence on PFS.

Interestingly, if the surgeon or the radiologist did exclude brain invasion explicitly, no local failure was recorded in these subgroups. Even though the number of respective patients was rather small, this information might give some indication of improved PFS.

In conclusion, the investigation of brain invasion did not show conclusive results considering PFS in our cohort and might have limited prognostic value in patients undergoing radiotherapy.

Several groups reported on bone involvement as a negative prognostic factor in atypical meningiomas [5, 21, 22]. The issue of different modalities to investigate bone involvement has been addressed before. Pieper et al. (1999) found a distinct association between radiographic evidence and histological validation of involved bony areas [23]. In line with these findings, if bone involvement was described in the operative report, these findings correlated well with imaging and histopathologic evaluations in our study. The single discrepant case with negative pathology might have been due to limited tissue and difficult differentiation between invasion and tumour metaplasia. However, in a relevant number of cases, no bone tissue was assessable for histopathology as, commonly, bone tissue is not routinely sent to pathology in spite of macroscopically visible invasion. The discrepancy between surgically assessed bone involvement and lack of bone tissue in histopathology has previously been observed [5]. The authors suggested a causal relationship of increased dural cauterization and reduced surgical aggressiveness of bone treatment. As a relevant number of local recurrences in case of bone involvement was found in this surgically treated cohort (atypical meningiomas; adjuvant radiotherapy was applied in 23% of cases), the authors speculated on residual tumour cells and discussed the potential benefit of adjuvant radiotherapy including the involved bony regions. In line with these recommendations, in our irradiated patients, bone involvement did not occur as a negative prognostic factor for PFS. Of note, PET imaging has been reported as having higher sensitivity and as being able to maintain specificity compared to MRI in detecting bone invasion [24] and seems to support target volume delineation [11]. However, radiation oncologists have to be aware of the limits of PET imaging with possible overestimation of tumor volumes due to thresholding and underestimate tumor volumes in small volume disease such as dural tails due to partial volume effects. Even though imperfect registrations and resolution issues need to be considered, improved detection of bony involvement by PET imaging might have supported treatment planning and local control in our cohort.

## Conclusions

Brain and bone invasion did not conclusively influence PFS in our irradiated cohort. The potentially negative prognostic impact of brain or bone invasion might have been attenuated by elaborate radiation techniques (IMRT) and the support of advanced diagnostic imaging (PET/CT, PET/MRI). Considerations and assessability of brain or bone invasion can differ notably between diagnostic modalities. This might be addressed by intensified communication between specialties. Furthermore, we recommend a particular integrative synopsis judgement of histopathological, surgical and imaging information as considerable implications occur if invasion is determined.

## Acknowledgements

We would like to thank C. Goltermann for the language editing.

### Ethics approval and consent to participate

This study was approved by the local ethics committee Tuebingen, Germany (417/2017B02) and follows the principles of the Declaration of Helsinki. For this type of study formal consent is not required.

### Consent for publication

Not applicable.

### Competing interests

The authors declare that they have no competing interests.

Open AccessThis article is distributed under the terms of the Creative Commons Attribution 4.0 International License (http://​creativecommons.​org/​licenses/​by/​4.​0/​), which permits unrestricted use, distribution, and reproduction in any medium, provided you give appropriate credit to the original author(s) and the source, provide a link to the Creative Commons license, and indicate if changes were made. The Creative Commons Public Domain Dedication waiver (http://​creativecommons.​org/​publicdomain/​zero/​1.​0/​) applies to the data made available in this article, unless otherwise stated.

## Publisher’s Note

Springer Nature remains neutral with regard to jurisdictional claims in published maps and institutional affiliations.

insite

INHALT

- Background
- Methods
- Results
- Discussion
- Conclusions
- Acknowledgements
- Ethics approval and consent to participate
- Consent for publication
- Competing interests
- Publisher’s Note

download

DOWNLOAD

print

DRUCKEN

Anhänge

## Additional file

Additional file 1:
Figure S1. Overview of assessable reports (‘yes’ or ‘no’) in regard to brain invasion and available, overlapping reports of the different modalities. Figure S2. Assessable reports (‘yes’ or ‘no’) in regard to bone involvement and the overlap of the different modalities. Figure S3. Cross-classification tables for a) the surgeon’s description of brain invasion and corresponding histopathologic findings and b) operative reports considering bone invasion and associated imaging-based findings. Only assessable and distinct results (‘yes’ and ‘no’) were considered. (PDF 122 kb)

Literatur

1.

Zurück zum Zitat Goldbrunner R, Minniti G, Preusser M, Jenkinson MD, Sallabanda K, Houdart E, et al. EANO guidelines for the diagnosis and treatment of meningiomas. Lancet Oncol. 2016;17(9):e383–91.CrossRef
Goldbrunner R, Minniti G, Preusser M, Jenkinson MD, Sallabanda K, Houdart E, et al. EANO guidelines for the diagnosis and treatment of meningiomas. Lancet Oncol. 2016;17(9):e383–91.CrossRef

2.

Zurück zum Zitat Gallagher MJ, Jenkinson MD, Brodbelt AR, Mills SJ, Chavredakis E. WHO grade 1 meningioma recurrence: are location and Simpson grade still relevant? Clin Neurol Neurosurg. 2016;141:117–21.CrossRef
Gallagher MJ, Jenkinson MD, Brodbelt AR, Mills SJ, Chavredakis E. WHO grade 1 meningioma recurrence: are location and Simpson grade still relevant? Clin Neurol Neurosurg. 2016;141:117–21.CrossRef

3.

Zurück zum Zitat Lam Shin Cheung V, Kim A, Sahgal A, Das S. Meningioma recurrence rates following treatment: a systematic analysis. J Neuro-Oncol. 2018;136(2):351–61.CrossRef
Lam Shin Cheung V, Kim A, Sahgal A, Das S. Meningioma recurrence rates following treatment: a systematic analysis. J Neuro-Oncol. 2018;136(2):351–61.CrossRef

4.

Zurück zum Zitat Nakasu S, Fukami T, Jito J, Nozaki K. Recurrence and regrowth of benign meningiomas. Brain Tumor Pathol. 2009;26(2):69–72.CrossRef
Nakasu S, Fukami T, Jito J, Nozaki K. Recurrence and regrowth of benign meningiomas. Brain Tumor Pathol. 2009;26(2):69–72.CrossRef

5.

Zurück zum Zitat Gabeau-Lacet D, Aghi M, Betensky RA, Barker FG, Loeffler JS, Louis DN. Bone involvement predicts poor outcome in atypical meningioma. J Neurosurg. 2009;111(3):464–71.CrossRef
Gabeau-Lacet D, Aghi M, Betensky RA, Barker FG, Loeffler JS, Louis DN. Bone involvement predicts poor outcome in atypical meningioma. J Neurosurg. 2009;111(3):464–71.CrossRef

6.

Zurück zum Zitat Perry A, Stafford SL, Scheithauer BW, Suman VJ, Lohse CM. Meningioma grading: an analysis of histologic parameters. Am J Surg Pathol. 1997;21(12):1455–65.CrossRef
Perry A, Stafford SL, Scheithauer BW, Suman VJ, Lohse CM. Meningioma grading: an analysis of histologic parameters. Am J Surg Pathol. 1997;21(12):1455–65.CrossRef

7.

Zurück zum Zitat Louis DN, Perry A, Reifenberger G, von Deimling A, Figarella-Branger D, Cavenee WK, et al. The 2016 World Health Organization classification of tumors of the central nervous system: a summary. Acta Neuropathol. 2016;131(6):803–20.CrossRef
Louis DN, Perry A, Reifenberger G, von Deimling A, Figarella-Branger D, Cavenee WK, et al. The 2016 World Health Organization classification of tumors of the central nervous system: a summary. Acta Neuropathol. 2016;131(6):803–20.CrossRef

8.

Zurück zum Zitat Baumgarten P, Gessler F, Schittenhelm J, Skardelly M, Tews DS, Senft C, et al. Brain invasion in otherwise benign meningiomas does not predict tumor recurrence. Acta Neuropathol. 2016;132(3):479–81.CrossRef
Baumgarten P, Gessler F, Schittenhelm J, Skardelly M, Tews DS, Senft C, et al. Brain invasion in otherwise benign meningiomas does not predict tumor recurrence. Acta Neuropathol. 2016;132(3):479–81.CrossRef

9.

Zurück zum Zitat Pizem J, Velnar T, Prestor B, Mlakar J, Popovic M. Brain invasion assessability in meningiomas is related to meningioma size and grade, and can be improved by extensive sampling of the surgically removed meningioma specimen. Clin Neuropathol. 2014;33(5):354–63.PubMed
Pizem J, Velnar T, Prestor B, Mlakar J, Popovic M. Brain invasion assessability in meningiomas is related to meningioma size and grade, and can be improved by extensive sampling of the surgically removed meningioma specimen. Clin Neuropathol. 2014;33(5):354–63.PubMed

10.

Zurück zum Zitat Spille DC, Hess K, Sauerland C, Sanai N, Stummer W, Paulus W, et al. Brain invasion in Meningiomas: incidence and correlations with clinical variables and prognosis. World Neurosurg. 2016;93:346–54.CrossRef
Spille DC, Hess K, Sauerland C, Sanai N, Stummer W, Paulus W, et al. Brain invasion in Meningiomas: incidence and correlations with clinical variables and prognosis. World Neurosurg. 2016;93:346–54.CrossRef

11.

Zurück zum Zitat Gehler B, Paulsen F, Oksuz MO, Hauser TK, Eschmann SM, Bares R, et al. [68Ga]-DOTATOC-PET/CT for meningioma IMRT treatment planning. Radiat Oncol. 2009;4:56.CrossRef
Gehler B, Paulsen F, Oksuz MO, Hauser TK, Eschmann SM, Bares R, et al. [68Ga]-DOTATOC-PET/CT for meningioma IMRT treatment planning. Radiat Oncol. 2009;4:56.CrossRef

12.

Zurück zum Zitat Rogers L, Zhang P, Vogelbaum MA, Perry A, Ashby LS, Modi JM, et al. Intermediate-risk meningioma: initial outcomes from NRG oncology RTOG 0539. J Neurosurg. 2018;129(1):35–47.CrossRef
Rogers L, Zhang P, Vogelbaum MA, Perry A, Ashby LS, Modi JM, et al. Intermediate-risk meningioma: initial outcomes from NRG oncology RTOG 0539. J Neurosurg. 2018;129(1):35–47.CrossRef

13.

Zurück zum Zitat Zollner B, Ganswindt U, Maihofer C, Corradini S, Albert NL, Schichor C, et al. Recurrence pattern analysis after [(68)Ga]-DOTATATE-PET/CT -planned radiotherapy of high-grade meningiomas. Radiat Oncol. 2018;13(1):110.CrossRef
Zollner B, Ganswindt U, Maihofer C, Corradini S, Albert NL, Schichor C, et al. Recurrence pattern analysis after [(68)Ga]-DOTATATE-PET/CT -planned radiotherapy of high-grade meningiomas. Radiat Oncol. 2018;13(1):110.CrossRef

14.

Zurück zum Zitat Abry E, Thomassen IO, Salvesen OO, Torp SH. The significance of Ki-67/MIB-1 labeling index in human meningiomas: a literature study. Pathol Res Pract. 2010;206(12):810–5.CrossRef
Abry E, Thomassen IO, Salvesen OO, Torp SH. The significance of Ki-67/MIB-1 labeling index in human meningiomas: a literature study. Pathol Res Pract. 2010;206(12):810–5.CrossRef

15.

Zurück zum Zitat Chen WC, Magill ST, Wu A, Vasudevan HN, Morin O, Aghi MK, et al. Histopathological features predictive of local control of atypical meningioma after surgery and adjuvant radiotherapy. J Neurosurg. 2018:1–8.
Chen WC, Magill ST, Wu A, Vasudevan HN, Morin O, Aghi MK, et al. Histopathological features predictive of local control of atypical meningioma after surgery and adjuvant radiotherapy. J Neurosurg. 2018:1–8.

16.

Zurück zum Zitat de Almeida AN, Pereira BJA, Pires Aguiar PH, Paiva WS, Cabrera HN, da Silva CC, et al. Clinical outcome, tumor recurrence, and causes of death: a long-term follow-up of surgically treated Meningiomas. World Neurosurg. 2017;102:139–43.CrossRef
de Almeida AN, Pereira BJA, Pires Aguiar PH, Paiva WS, Cabrera HN, da Silva CC, et al. Clinical outcome, tumor recurrence, and causes of death: a long-term follow-up of surgically treated Meningiomas. World Neurosurg. 2017;102:139–43.CrossRef

17.

Zurück zum Zitat Chen WC, Hara J, Magill ST, Wu A, Aghi MK, Theodosopoulos PV, et al. Salvage therapy outcomes for atypical meningioma. J Neuro-Oncol. 2018;138(2):425–33.CrossRef
Chen WC, Hara J, Magill ST, Wu A, Aghi MK, Theodosopoulos PV, et al. Salvage therapy outcomes for atypical meningioma. J Neuro-Oncol. 2018;138(2):425–33.CrossRef

18.

Zurück zum Zitat Mirimanoff RO, Dosoretz DE, Linggood RM, Ojemann RG, Martuza RL. Meningioma: analysis of recurrence and progression following neurosurgical resection. J Neurosurg. 1985;62(1):18–24.CrossRef
Mirimanoff RO, Dosoretz DE, Linggood RM, Ojemann RG, Martuza RL. Meningioma: analysis of recurrence and progression following neurosurgical resection. J Neurosurg. 1985;62(1):18–24.CrossRef

19.

Zurück zum Zitat Sun SQ, Cai C, Murphy RK, DeWees T, Dacey RG, Grubb RL, et al. Radiation therapy for residual or recurrent atypical meningioma: the effects of modality, timing, and tumor pathology on long-term outcomes. Neurosurgery. 2016;79(1):23–32.CrossRef
Sun SQ, Cai C, Murphy RK, DeWees T, Dacey RG, Grubb RL, et al. Radiation therapy for residual or recurrent atypical meningioma: the effects of modality, timing, and tumor pathology on long-term outcomes. Neurosurgery. 2016;79(1):23–32.CrossRef

20.

Zurück zum Zitat Brokinkel B, Hess K, Mawrin C. Brain invasion in meningiomas-clinical considerations and impact of neuropathological evaluation: a systematic review. Neuro-Oncology. 2017;19(10):1298–307.CrossRef
Brokinkel B, Hess K, Mawrin C. Brain invasion in meningiomas-clinical considerations and impact of neuropathological evaluation: a systematic review. Neuro-Oncology. 2017;19(10):1298–307.CrossRef

21.

Zurück zum Zitat Nowak A, Dziedzic T, Krych P, Czernicki T, Kunert P, Marchel A. Benign versus atypical meningiomas: risk factors predicting recurrence. Neurol Neurochir Pol. 2015;49(1):1–10.CrossRef
Nowak A, Dziedzic T, Krych P, Czernicki T, Kunert P, Marchel A. Benign versus atypical meningiomas: risk factors predicting recurrence. Neurol Neurochir Pol. 2015;49(1):1–10.CrossRef

22.

Zurück zum Zitat Shakir SI, Souhami L, Petrecca K, Mansure JJ, Singh K, Panet-Raymond V, et al. Prognostic factors for progression in atypical meningioma. J Neurosurg. 2018:1–9.
Shakir SI, Souhami L, Petrecca K, Mansure JJ, Singh K, Panet-Raymond V, et al. Prognostic factors for progression in atypical meningioma. J Neurosurg. 2018:1–9.

23.

Zurück zum Zitat Pieper DR, Al-Mefty O, Hanada Y, Buechner D. Hyperostosis associated with meningioma of the cranial base: secondary changes or tumor invasion. Neurosurgery. 1999;44(4):742–6 discussion 6-7.CrossRef
Pieper DR, Al-Mefty O, Hanada Y, Buechner D. Hyperostosis associated with meningioma of the cranial base: secondary changes or tumor invasion. Neurosurgery. 1999;44(4):742–6 discussion 6-7.CrossRef

24.

Zurück zum Zitat Kunz WG, Jungblut LM, Kazmierczak PM, Vettermann FJ, Bollenbacher A, Tonn JC, et al. Improved detection of Transosseous Meningiomas using (68)Ga-DOTATATE PET/CT compared with contrast-enhanced MRI. J Nucl Med. 2017;58(10):1580–7.CrossRef
Kunz WG, Jungblut LM, Kazmierczak PM, Vettermann FJ, Bollenbacher A, Tonn JC, et al. Improved detection of Transosseous Meningiomas using (68)Ga-DOTATATE PET/CT compared with contrast-enhanced MRI. J Nucl Med. 2017;58(10):1580–7.CrossRef

Metadaten

Titel
:   Integrative assessment of brain and bone invasion in meningioma patients

verfasst von
:   Kerstin Zwirner   
     Frank Paulsen   
     Jens Schittenhelm   
     Irina Gepfner-Tuma   
     Ghazaleh Tabatabai   
     Felix Behling   
     Marco Skardelly   
     Benjamin Bender   
     Daniel Zips   
     Franziska Eckert

Publikationsdatum
:   01.12.2019

Verlag
:   BioMed Central

Erschienen in
:   Radiation Oncology 
    / Ausgabe 1/2019
      
    Elektronische ISSN: 1748-717X

DOI
:   https://doi.org/10.1186/s13014-019-1341-x

### Weitere Artikel der Ausgabe 1/2019


Zur Ausgabe

Research

### Increased heat shock protein 70 (Hsp70) serum levels and low NK cell counts after radiotherapy – potential markers for predicting breast cancer recurrence?

Research

### Development and validation of a risk prediction model for radiotherapy-related esophageal fistula in esophageal cancer

Research

### Low-level laser therapy in treatment of chemoradiotherapy-induced mucositis in head and neck cancer: results of a randomised, triple blind, multicentre phase III trial

Research

### Direct radiation-induced effects on dental hard tissue

Research

### A novel amplitude binning strategy to handle irregular breathing during 4DMRI acquisition: improved imaging for radiotherapy purposes

Research

### Rectum-spacer related acute toxicity – endoscopy results of 403 prostate cancer patients after implantation of gel or balloon spacers

Anzeige

## Neu im Fachgebiet Onkologie

## Umsetzung der POMGAT-Leitlinie läuft

03.05.2024


DCK 2024
Kongressbericht

Seit November 2023 gibt es evidenzbasierte Empfehlungen zum perioperativen Management bei gastrointestinalen Tumoren (POMGAT) auf S3-Niveau. Vieles wird schon entsprechend der Empfehlungen durchgeführt. Wo es im Alltag noch hapert, zeigt eine Umfrage in einem Klinikverbund.

## CUP-Syndrom: Künstliche Intelligenz kann Primärtumor finden

30.04.2024


Künstliche Intelligenz
Nachrichten

Krebserkrankungen unbekannten Ursprungs (CUP) sind eine diagnostische Herausforderung. KI-Systeme können Pathologen dabei unterstützen, zytologische Bilder zu interpretieren, um den Primärtumor zu lokalisieren.

## Sind Frauen die fähigeren Ärzte?

30.04.2024


Gendermedizin
Nachrichten

Patienten, die von Ärztinnen behandelt werden, dürfen offenbar auf bessere Therapieergebnisse hoffen als Patienten von Ärzten. Besonders gilt das offenbar für weibliche Kranke, wie eine Studie zeigt.

## Adjuvante Immuntherapie verlängert Leben bei RCC

25.04.2024


Nierenkarzinom
Nachrichten

Nun gibt es auch Resultate zum Gesamtüberleben: Eine adjuvante Pembrolizumab-Therapie konnte in einer Phase-3-Studie das Leben von Menschen mit Nierenzellkarzinom deutlich verlängern. Die Sterberate war im Vergleich zu Placebo um 38% geringer.

## Update Onkologie

Bestellen Sie unseren Fach-Newsletterund bleiben Sie gut informiert.

Newsletter bestellen

- » zur Themenseite Onkologie

Bildnachweise

Frau nutzt Gehhilfe /© Photographee.eu / Fotolia (Symbolbild mit Fotomodellen), Ärztin und künstliche Intelligenz sehen sich Befunde an/© Alexander Limbach / Zoonar/picture alliance (Symbolbild mit Fotomodell), Ärztin informiert ältere Patientin/© pucko\_ns / stock.adobe.com (Symbolbild mit Fotomodellen), Ein Mann erhält eine Infusion/© Denis / Stock.adobe.com (Symbolbild mit Fotomodell)

- Home
  - CME
  - Facharzt-Training
  - Webinare
  - Zeitschriften
  - Bücher
  - e.Medpedia
  - Springer Medizin Podcast – der Talk für Gesundheitsprofis
- Pseudoseite
  - Newsletter
  - Abo-Shop
- Service
  - Jobbörse
  - Info & Hilfe
- Fachgebiete
  - Anästhesiologie
  - Allgemeinmedizin
  - Arbeitsmedizin
  - Augenheilkunde
  - Chirurgie
  - Dermatologie
  - Gynäkologie und Geburtshilfe
  - HNO
  - Innere Medizin
  - Kardiologie
  - Neurologie
  - Onkologie und Hämatologie
  - Orthopädie und Unfallchirurgie
  - Pädiatrie
  - Pathologie
  - Psychiatrie
  - Radiologie
  - Rechtsmedizin
  - Urologie
  - Zahnmedizin
- Themen
  - Klimawandel und Gesundheit
  - Neues aus dem Markt
  - COVID-19
  - Praxis und Beruf
  - Seltene Erkrankungen
  - GOÄ & EBM
  - Panorama
- Sammlungen
  - Kasuistiken
  - Algorithmen & Infografiken
  - Blickdiagnosen
  - Arthropedia
  - FlapFinder
  - Videos
  - Kongressberichterstattung
  - Medizin für Apothekerinnen und Apotheker
  - Für Ärztinnen und Ärzte in Weiterbildung
  - Für Medizinstudierende

SpringerMedizin.de – Mein Fachwissen. Aktuelle, verlässliche Information und Fortbildung für Ärztinnen und Ärzte im Berufsalltag.

#### Direktzugriff

Home


Fachgebiete


CME-Fortbildung


Facharzt-Training


Webinare


Zeitschriften


Bücher


e.Medpedia

#### Meine Inhalte

Meine Lesezeichen


Meine Newsletter


Mein CME (Punktekonto)


Mein e.Med


Meine Zeitschriften


Mein b.Flat


Mein e.Dent

#### Abo-Shop

e.Med Interdisziplinär


e.Med für Ihr Fachgebiet


e.Medpedia


e.Dent


Zeitschriften


Bücher


FlapFinder


Angebote für Kliniken

#### Info- und Hilfeseiten

Info & Hilfe


Kundenservice


Über SpringerMedizin.de


Warum registrieren?


Nachhaltigkeitsinitiative Impuls


Für Autorinnen und Autoren


Für Gutachterinnen und Gutachter


Mediadaten & Werbemöglichkeiten


Jobbörse

#### Folgen Sie uns

Instagram


X


Facebook


YouTube


LinkedIn

#### Rechtliche Informationen

Allgemeine Geschäftsbedingungen


Nutzungsbedingungen


Datenschutzerklärung


Impressum


Cookies verwalten


Verträge hier kündigen

#### Für Mitglieder von Fachgesellschaften

Organ-Zeitschriften


BDC


BDI


DGIIN


DGIM


DGKJ

DGN


DGOU, BVOU, DGU, DGOOC und VLOU


DGRh


DOG


Deutsche Schmerzgesellschaft


ÖGKJ

Springer Nature Logo

© Springer Medizin Verlag GmbH

Version: 0.3569.0
