# Supplementary material for: Onderzoek bloei Nerine bowdenii: invloed groeiduur op bloei
Source: Springer Nature journal article supplement (doi:10.1186/s13014-019-1341-x), 1984-01-01
Supplement: MOESM1 [file 17019730]

# Supplemental Figure 1

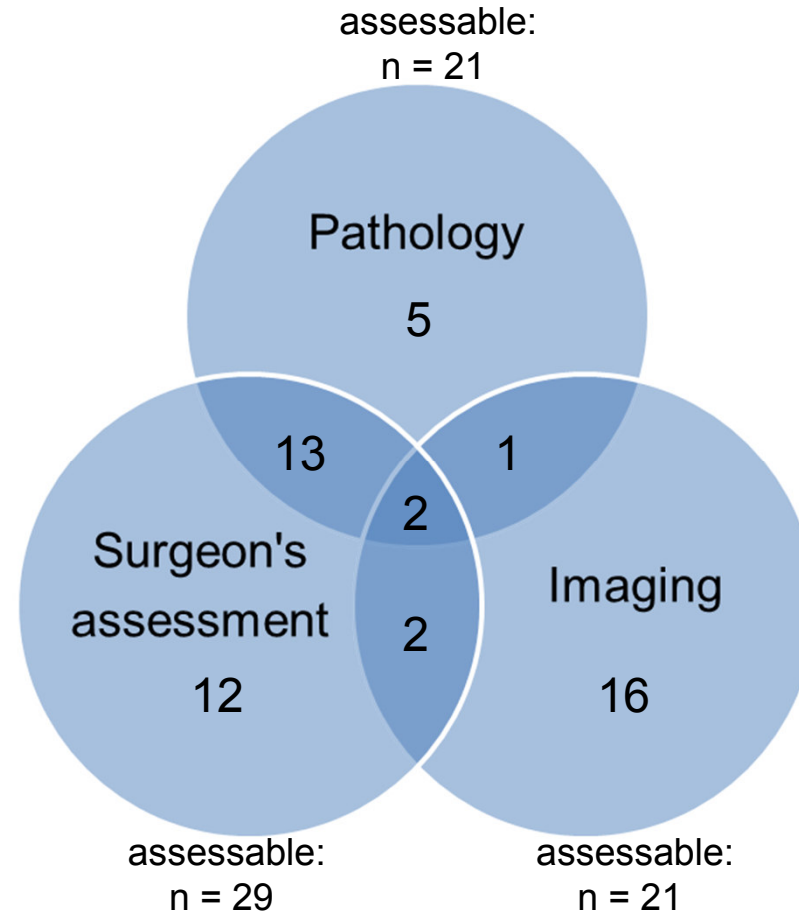

Brain invasion: assessable reports (,yes' or ,no') according to the modalities.

## Supplemental Figure 2

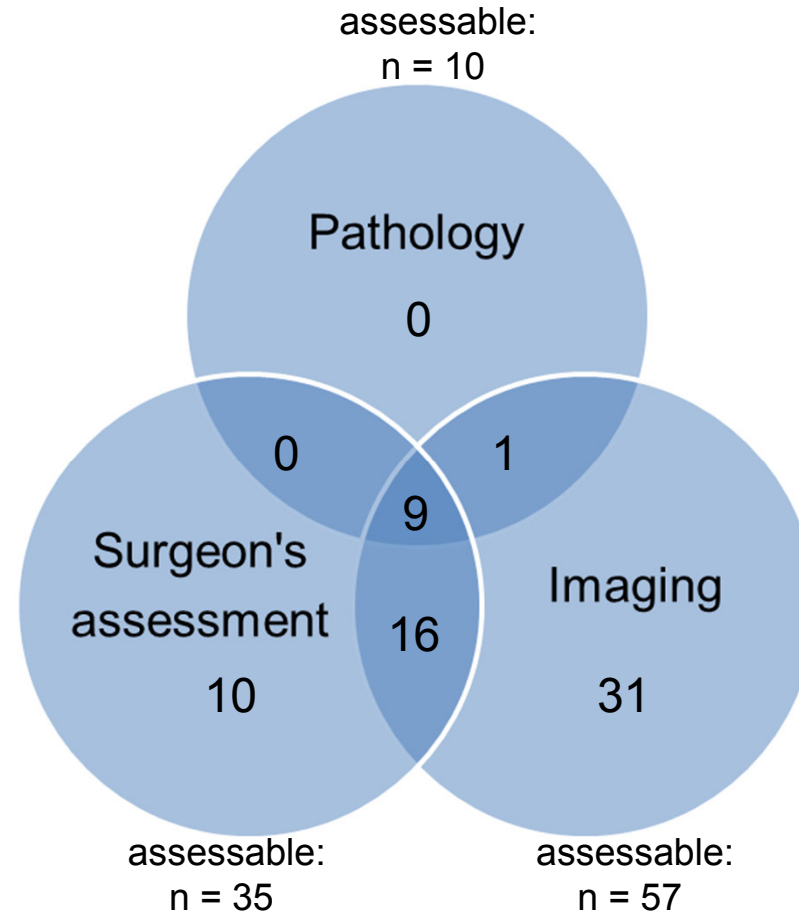

Bone involvement: assessable reports (,yes' or ,no') according to the modalities.

Assessable reports (,yes' or ,no') in regard to bone involvement and the overlap of the different modalities

## Supplemental Figure 3

| a                                    |     | Surgeon's assessment of brain invasion |     |   |
|--------------------------------------|-----|----------------------------------------|-----|---|
|                                      |     | No                                     | Yes |   |
| Pathologically proven brain invasion | No  | 1                                      | 5   | 6 |
|                                      | Yes | 0                                      | 9   | 9 |
|                                      |     | 1                                      | 14  |   |

p-value = 0.205

| b                                      |     | Surgeon's assessment of bone involvement |     |    |
|----------------------------------------|-----|------------------------------------------|-----|----|
|                                        |     | No                                       | Yes |    |
| Imaging assessment of bone involvement | No  | 4                                        | 2   | 6  |
|                                        | Yes | 1                                        | 18  | 19 |
|                                        |     | 5                                        | 20  |    |

p-value = 0.001

Cross-classification tables for a) the surgeon's description of brain invasion and corresponding histopathologic findings and b) operative reports considering bone invasion and associated imaging-based findings. Only assessable and distinct results ('yes' and 'no') were considered
